# Supplementary figures and images for: Handling alters aggression and “loser” effect formation in Drosophila melanogaster
Source: PubMed Central journal article supplement — Learn Mem. 2015 Feb;22(2):64–8. doi: 10.1101/lm.036418.114 (PMC4341365; doi:10.1101/lm.036418.114), 2015-02

Figure Supp 1

A

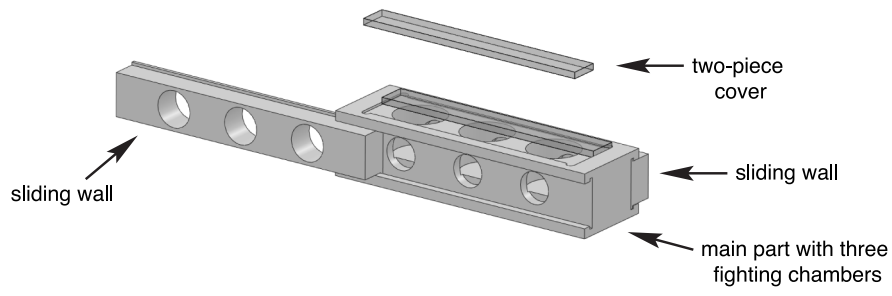

B

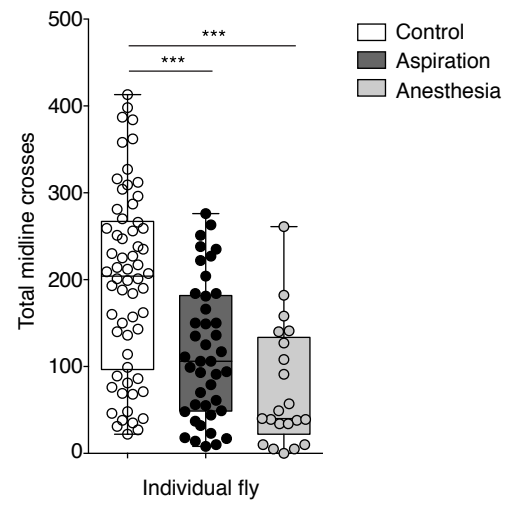

C

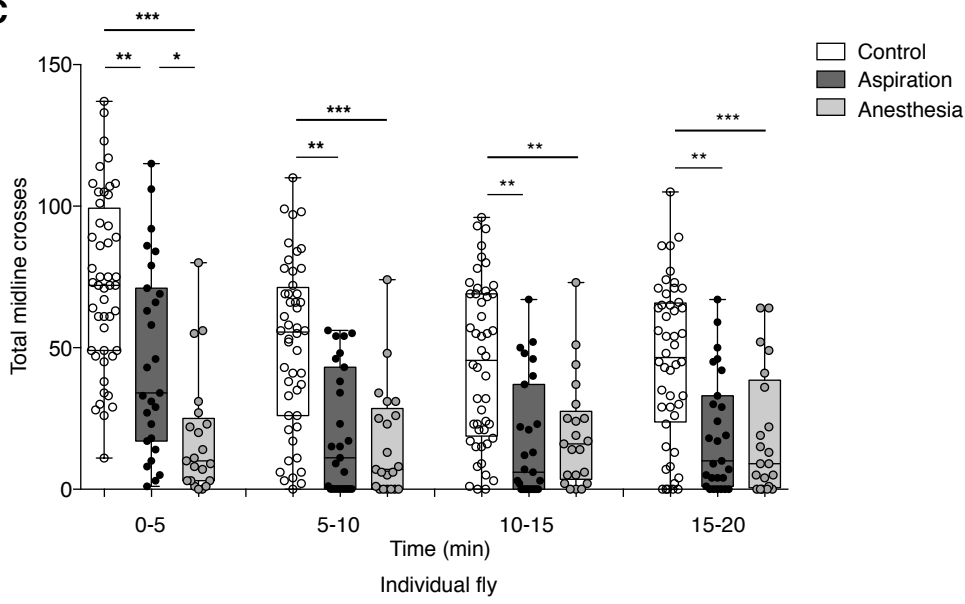

D

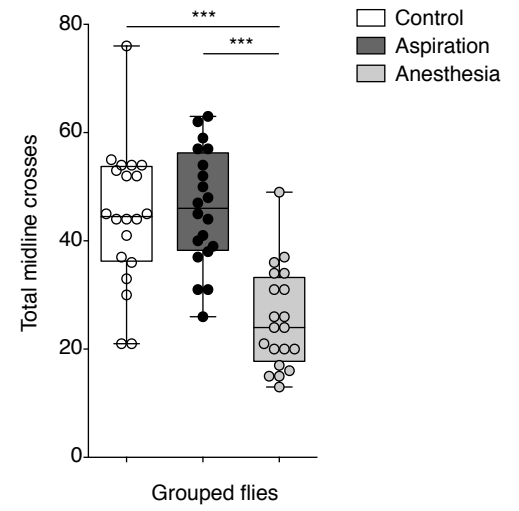

Supplement: supp_22.2.64_Supp_Figure_1.pdf [file supp_22.2.64_Supp_Figure_1.pdf]

**Figure Supp 2**

**A**

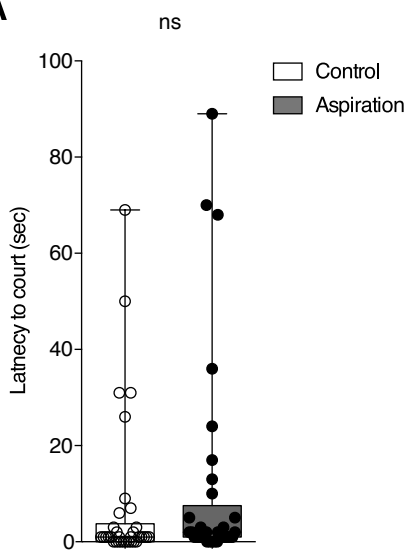

**B**

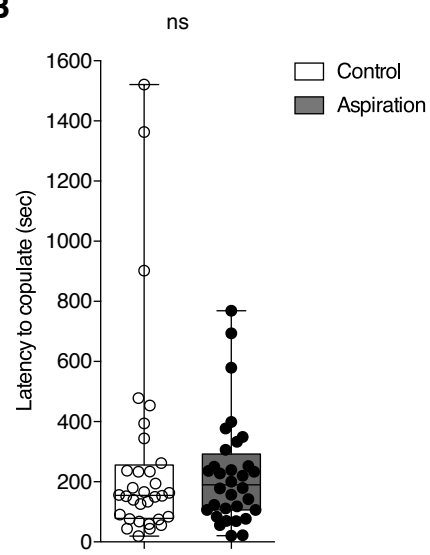

**C**

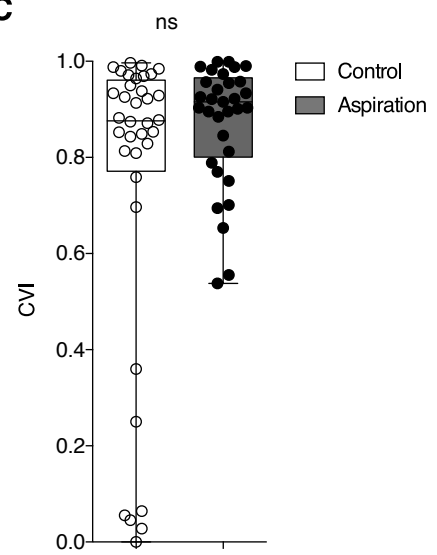

Supplement: supp_22.2.64_Supp_Figure_2.pdf [file supp_22.2.64_Supp_Figure_2.pdf]

**Figure Supp 3**

**A**

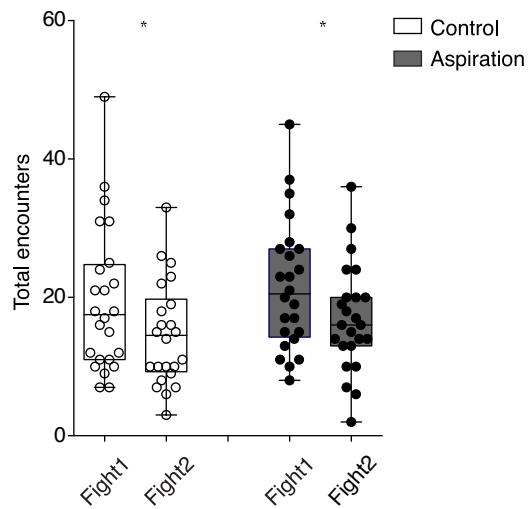

**B**

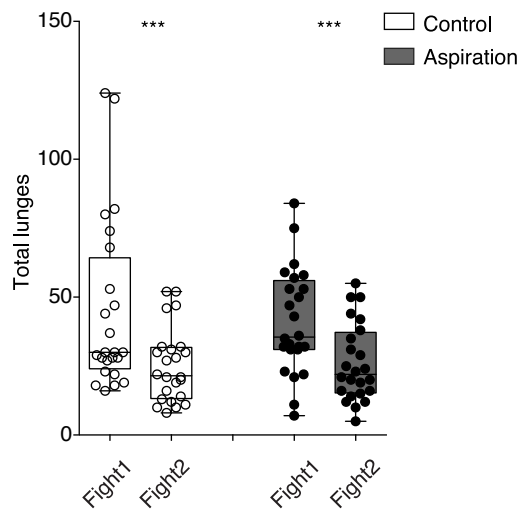

Supplement: supp_22.2.64_Supp_Figure_3.pdf [file supp_22.2.64_Supp_Figure_3.pdf]
